# Supplementary material for: Transition metal-promoted Fe-based catalysts for photothermal catalytic CO2 hydrogenation
Source: Royal Society of Chemistry journal article supplement (doi:10.1039/d4cy01271b), 2024-12-19
Supplement: d4cy01271b1.pdf [file d4cy01271b1.pdf]

## Supporting Information

### **Transition metal-promoted Fe-based catalysts for photothermal catalytic CO<sub>2</sub> hydrogenation**

Shuai Yan<sup>a</sup>, Yuting Wang<sup>a</sup>, Guangyao Chen<sup>a</sup>, Wanli Ma, Yingquan Chen<sup>a</sup>, Xianhua Wang<sup>a</sup>, Kuo

Zeng<sup>a</sup>, Yonggang Yao<sup>b</sup>, Hongqi Sun<sup>\*,c</sup>, Haiping Yang<sup>\*,a</sup>, Hanping Chen<sup>a</sup>

a State Key Laboratory of Coal Combustion, School of Energy and Power Engineering, Huazhong

University of Science and Technology, Wuhan 430074, China.

b State Key Laboratory of Materials Processing and Die & Mould Technology, School of

Materials Science and Engineering, Huazhong University of Science and Technology, Wuhan,

430074, China.

c School of Molecular Sciences, The University of Western Australia, Perth, WA 6009, Australia.

\* E-mail: yhping2002@163.com (Yang), hongqi.sun@uwa.edu.au (Sun)

## Supporting Text

### Catalysts preparation

Typically, metal nitrates were firstly dissolved in water to give solution A with total concentration of 0.4 M (M : Fe = 1 : 4). Then solution A was dropwise added into excess NaOH solution with addition of 2 ml PEG in advance under vigorous stirring. After aging for 4 h, the obtained precipitation was collected by a filter and washed repeatedly by DI water until the filtrate reached neutral pH. The filter cake was dried overnight and calcined at 450 °C for 3 h in a muffle furnace. Finally, all samples were pre-activated under hydrogen atmosphere at 400 °C for 2 h followed by passivation by 1% O<sub>2</sub>/N<sub>2</sub> to give MFeO<sub>x</sub> catalysts. For ZnFe sample, the NaOH solution was replaced by NaOH/Na<sub>2</sub>CO<sub>3</sub> mixed solution in case of redissolution of zincates.

### Photothermocatalytic CO<sub>2</sub> hydrogenation evaluation

In a typical batch test, 100 mg catalyst was dispersed on a quartz fiber filter to form a radiation area around 3.14 cm<sup>2</sup>. Then the catalyst film was placed on the bottom center of the reactor followed by sealing the reactor and purging the chamber with feeding gas (CO<sub>2</sub>/H<sub>2</sub>/N<sub>2</sub> = 3:9:1). The batch tests were carried out under 2.8 W cm<sup>-2</sup> and 0.2 MPa for 2 h. During the reaction, the temperature of catalyst bed was monitored by thermocouples and the results were illustrated in Fig. S2. After the reaction, the reactor was heated to 220 °C to vaporize liquid products and they directly flowed to a gas chromatograph equipped with TCD and FID detectors (Panna 91 Plus) along 200 °C heating tube. The dark contrast tests were conducted under the same conditions except for light irradiation.

For flow type tests, the temperature of catalyst bed was fixed at 300 °C by irradiation of 2.0 W cm<sup>-2</sup> and external heating to rule out the difference in light-heat conversion between different MFeO<sub>x</sub> catalysts. In addition, the reaction atmosphere was identical to the batch type with a total flow rate of 13 mL min<sup>-1</sup>. The online product was collected and analyzed after 2 h reaction. The dark contrast tests were conducted under the same conditions besides the introduction of light.

Equations used to calculate the CO<sub>2</sub> conversion and products selectivity are listed below:

$$\chi(\text{CO}_2) = \frac{c(\text{CO}_2)_{\text{inlet}} - \frac{c(\text{N}_2)_{\text{inlet}}}{c(\text{N}_2)_{\text{outlet}}} \times c(\text{CO}_2)_{\text{outlet}}}{c(\text{CO}_2)_{\text{inlet}}} \times 100\% \quad S(\text{CO}) = \frac{c(\text{CO})}{c(\text{CO}) + c(\text{CH}_4) + c(\text{C}_2+)} \times 100\% \quad (1)$$

$$(2) \quad (3)$$

$$S(CH_4) = \frac{c(CH_4)}{c(CO) + c(CH_4) + c(C_{2+})} \times 100\% \quad (4)$$

$$S(C_{2+}) = \frac{c(C_{2+})}{c(CO) + c(CH_4) + c(C_{2+})} \times 100\%$$

where  $\chi(CO_2)$  represents the  $CO_2$  conversion while  $S(CO)$ ,  $S(CH_4)$  and  $S(C_{2+})$  stand for the selectivity toward  $CO$ ,  $CH_4$  and  $C_{2+}$  respectively. The gas molar concentration  $c(CO)$ ,  $c(CH_4)$ ,  $c(C_{2+})$  and  $CO_2$  molar concentration for inlet  $c(CO_2)_{inlet}$ , outlet  $c(CO_2)_{outlet}$  were obtained from gas chromatograph standardization. Besides, the space-time yield was calculated by formula listed below.

$$STY(CO) = \frac{F_{inlet}(mmol/h) \times c(CO) \times c(N_2)_{outlet}}{m_{catalyst}(g) \times c(N_2)_{outlet}} \times 100\% \quad (5)$$

$$STY(CH_4) = \frac{F_{inlet}(mmol/h) \times c(CH_4) \times c(N_2)_{outlet}}{m_{catalyst}(g) \times c(N_2)_{outlet}} \times 100\% \quad (6)$$

$$STY(C_{2+}) = \frac{F_{inlet}(mmol/h) \times c(C_{2+}) \times c(N_2)_{outlet}}{m_{catalyst}(g) \times c(N_2)_{outlet}} \times 100\% \quad (7)$$

where  $STY(CO)$ ,  $STY(CH_4)$  and  $STY(C_{2+})$  are space-time yield of  $CO$ ,  $CH_4$  and  $C_{2+}$  respectively. Total inlet molar flow rate  $F_{inlet}$  was obtained from mass flowmeters.

## Supporting Tables

**Table S1** Textural properties of the MFeO<sub>x</sub> catalysts.

| Sample | S <sub>BET</sub><br>(m <sup>2</sup> /g) | V <sub>p</sub><br>(cm <sup>3</sup> /g) | D <sub>p</sub><br>(nm) | Fe/M mole ratio |
|--------|-----------------------------------------|----------------------------------------|------------------------|-----------------|
| Fe     | 12.3                                    | 0.047                                  | 1.51                   | -               |
| CoFe   | 12.2                                    | 0.190                                  | 6.24                   | 4.02            |
| MnFe   | 17.0                                    | 0.236                                  | 5.53                   | 3.95            |
| ZnFe   | 13.3                                    | 0.190                                  | 5.73                   | 3.91            |
| CuFe   | 7.7                                     | 0.033                                  | 1.70                   | 4.03            |

**Table S2** Summarization of photothermal CO<sub>2</sub> hydrogenation catalysts for C<sub>2+</sub> production.

| Catalysts                                                 | Reaction conditions                       |                   |              |                                            |            | CO <sub>2</sub><br>Conversion<br>(%) | Product<br>Selectivity<br>(%) |                 |                 | C <sub>2+</sub><br>product<br>ion rate<br>(mmol<br>g <sub>cat</sub> <sup>-1</sup> h <sup>-1</sup> ) | Ref.             |
|-----------------------------------------------------------|-------------------------------------------|-------------------|--------------|--------------------------------------------|------------|--------------------------------------|-------------------------------|-----------------|-----------------|-----------------------------------------------------------------------------------------------------|------------------|
|                                                           | Light<br>intensity<br>(W/m <sup>2</sup> ) | Pressure<br>(MPa) | Test<br>type | Feed<br>rate<br>(ml/min)                   | T<br>(°C)  |                                      | CO                            | CH <sub>4</sub> | C <sub>2+</sub> |                                                                                                     |                  |
| Co-CoO <sub>x</sub> /MAO                                  | 1.2                                       | 0.3               | flow         | 2400<br>ml h <sup>-1</sup> g <sup>-1</sup> | 325        | 23.7                                 | 35.2                          | 24.3            | 40.5            | 1.303                                                                                               | [1]              |
| FeNi <sub>x</sub> /Fe <sub>2</sub> O <sub>3</sub> and NiO | 0.56                                      | 0.1               | flow         | 8                                          | 250        | ~24                                  | ~45                           | 40              | 15              | 0.673                                                                                               | [2]              |
| CoFe                                                      | -                                         | 0.18              | flow         | 25                                         | 250        | 7.76                                 | 59.18                         | 25.57           | 15.25           | -                                                                                                   | [3]              |
| CoFe/CoFe <sub>2</sub> O <sub>4</sub>                     | 2                                         | 0.1               | flow         | 2.5                                        | 300        | 12.9                                 | -                             | -               | 29.8            | 1.1                                                                                                 | [4]              |
| K-Ru/Fe <sub>3</sub> O <sub>4</sub>                       | 2.05                                      | 0.1               | flow         | 2                                          | 420        | ~35.0                                | ~65                           | ~12.3           | ~22.7           | 0.63                                                                                                | [5]              |
| <b>CoFe</b>                                               | <b>2.8</b>                                | <b>0.2</b>        | <b>flow</b>  | <b>13</b>                                  | <b>300</b> | <b>20.8</b>                          | <b>77.3</b>                   | <b>11.5</b>     | <b>11.2</b>     | <b>1.73</b>                                                                                         | <b>This work</b> |

## Supporting Figures

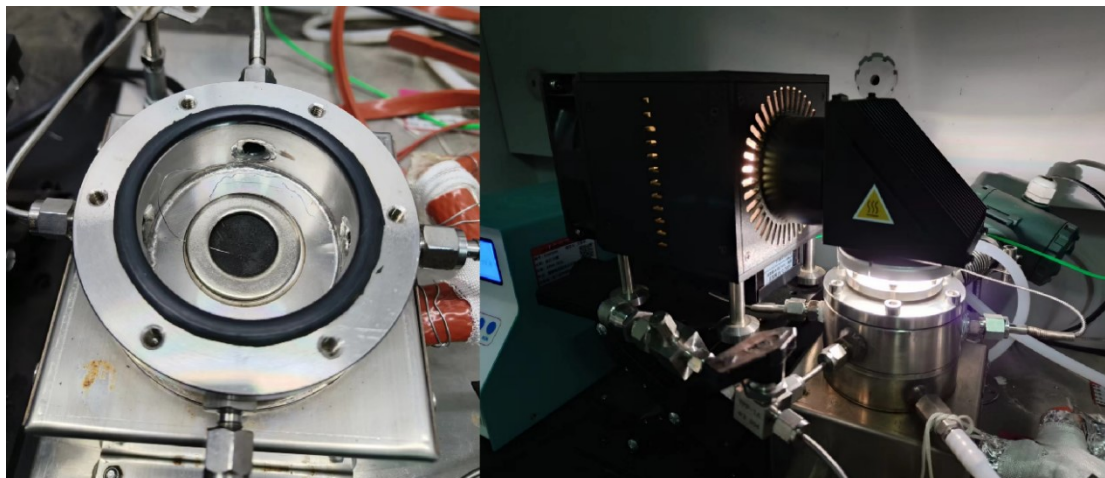

Fig. S1. The images of the photothermal reactor with thermocouples buried in the catalyst bed and Xenon lamp.

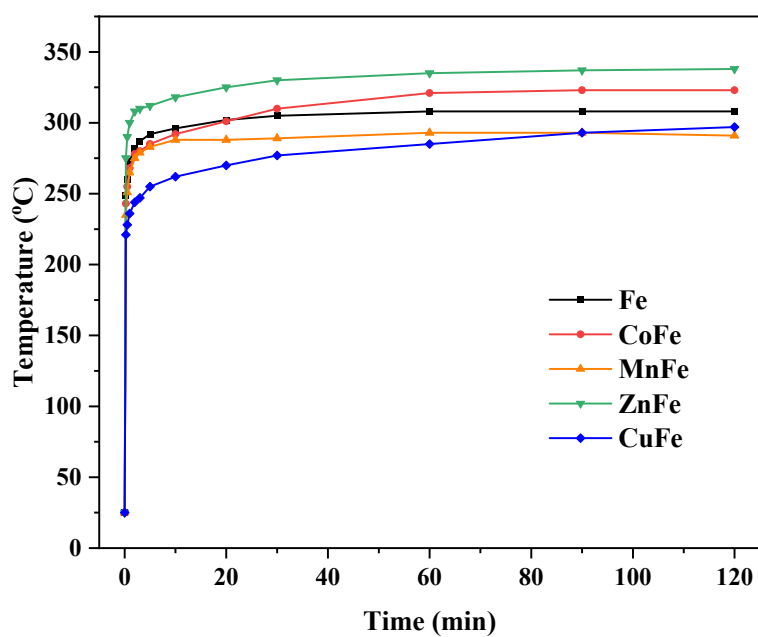

Fig. S2. Temperature profiles in batch-type tests for prepared  $\text{MFeO}_x$  catalysts.

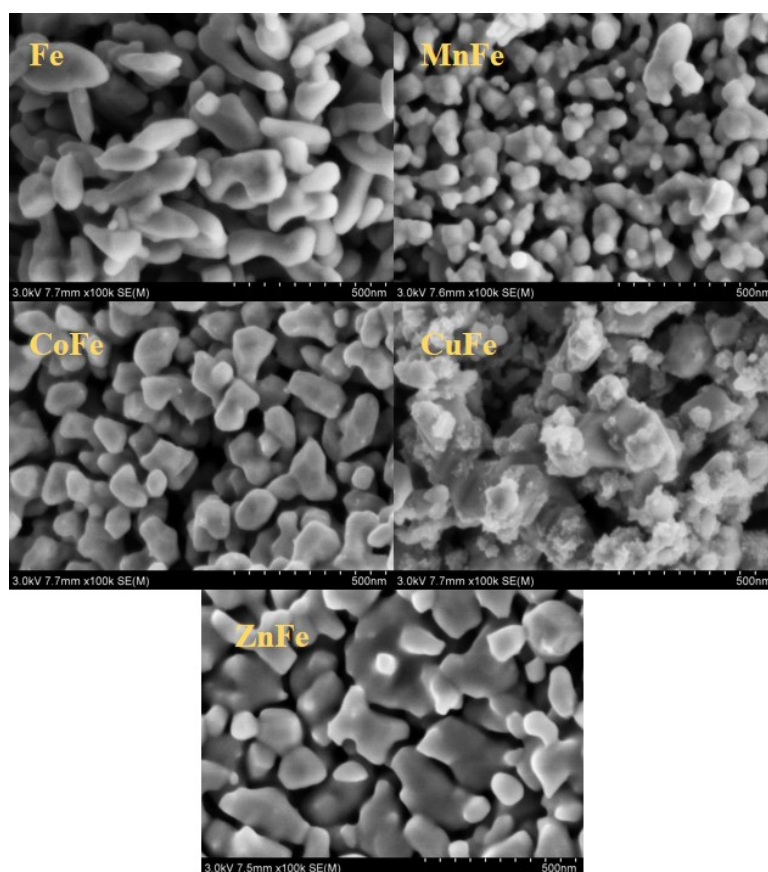

Fig. S3. SEM images of prepared  $MFeO_x$  catalysts.

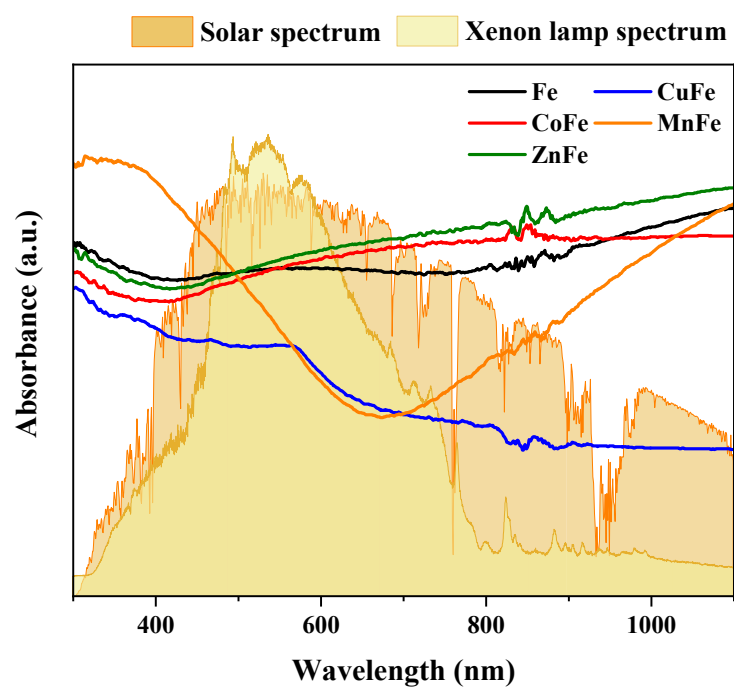

Fig. S4. UV-vis spectra of the prepared  $MFeO_x$  catalysts in comparison of the spectra from light sources.

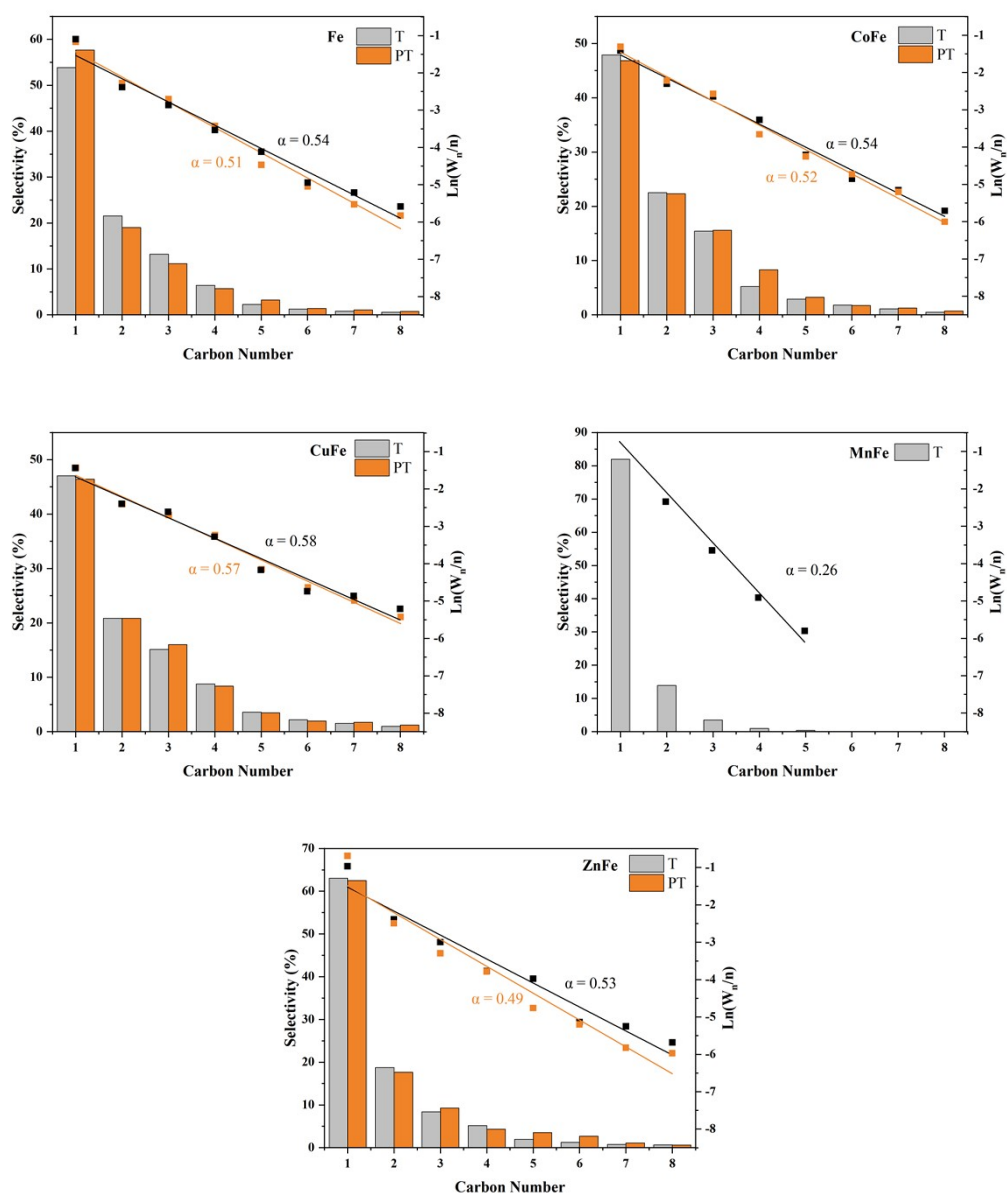

Fig. S5 Hydrocarbon distribution for  $C_{2+}$  and chain growth factor over  $MFeO_x$  catalysts.

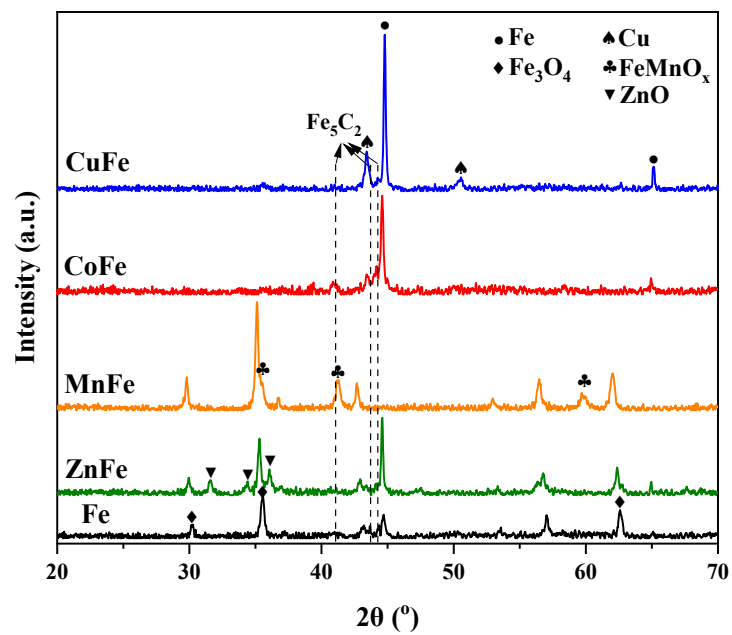

Fig. S6. XRD patterns of MFeO<sub>x</sub> catalysts spent in photothermal CO<sub>2</sub> hydrogenation.

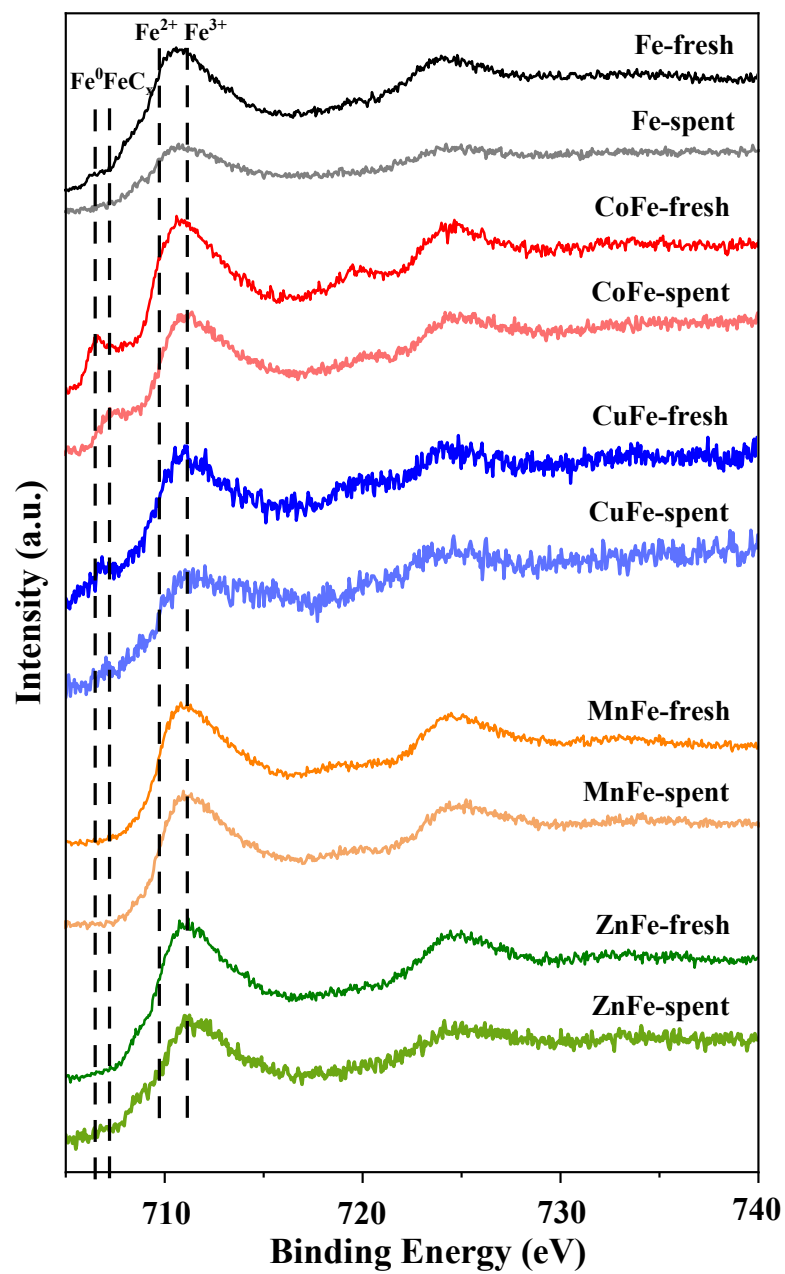

Fig. S7. Fe 2p XPS of MFeO<sub>x</sub> catalysts spent in photothermal CO<sub>2</sub> hydrogenation.

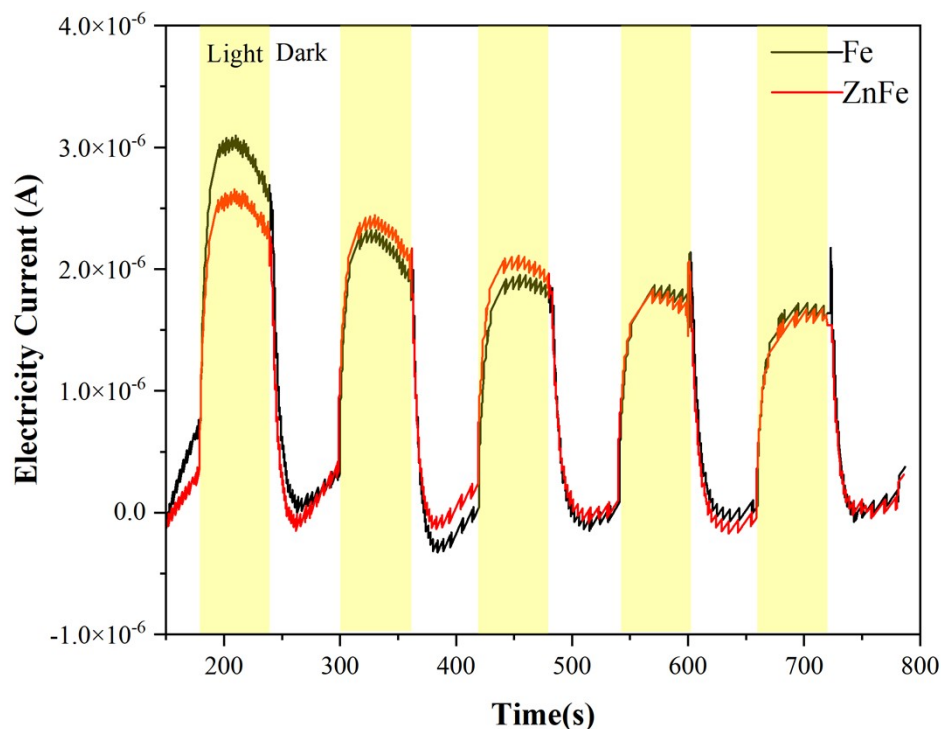

Fig. S8. Typical photocurrent of Fe and ZnFe catalyst in 0.1 M sodium sulfate electrolyte.

## Reference

- [1] S. Ning, H. Ou, Y. Li, C. Lv, S. Wang, D. Wang, J. Ye, Co(0) -Co( $\delta^+$ ) Interface Double-Site-Mediated C-C Coupling for the Photothermal Conversion of CO(2) into Light Olefins, *Angew Chem Int Ed Engl*, 62 (2023) e202302253. 10.1002/anie.202302253.
- [2] S. Zhu, N. Li, D. Zhang, T. Yan, Metal/oxide heterostructures derived from Prussian blue analogues for efficient photocatalytic CO<sub>2</sub> hydrogenation to hydrocarbons, *Journal of CO<sub>2</sub> Utilization*, 64 (2022). 10.1016/j.jcou.2022.102177.
- [3] J. Zhao, R. Shi, G.I.N. Waterhouse, T. Zhang, Selective photothermal CO<sub>2</sub> reduction to CO, CH<sub>4</sub>, alkanes, alkenes over bimetallic alloy catalysts derived from layered double hydroxide nanosheets, *Nano Energy*, 102 (2022). 10.1016/j.nanoen.2022.107650.
- [4] R. Song, Z. Li, J. Guo, P.N. Duchesne, C. Qiu, C. Mao, J. Jia, S. Tang, Y.F. Xu, W. Zhou, L. Wang, W. Sun, X. Yan, L. Guo, D. Jing, G.A. Ozin, Solar Hydrocarbons: Single-Step, Atmospheric-Pressure Synthesis of C<sub>2</sub>-C<sub>4</sub> Alkanes and Alkenes from CO<sub>2</sub>, *Angew Chem Int Ed Engl*, 62 (2023) e202304470. 10.1002/anie.202304470.
- [5] C. Song, Z. Wang, J. Zhao, X. Qin, M. Peng, Z. Gao, M. Xu, Y. Xu, J. Yan, Y. Bi, M. Wang, L. Chen, Z. Yin, X. Liu, J. Liu, J. Liu, D. Ma, Photothermal conversion of CO<sub>2</sub> into lower olefins at the interface of the K-promoted Ru/Fe<sub>3</sub>O<sub>4</sub> catalyst, *Chem Catalysis*, 4 (2024). 10.1016/j.checat.2024.100960.
